# Supplementary figures and images for: Exploring Interactions between Primary Hepatocytes and Non-Parenchymal Cells on Physiological and Pathological Liver Stiffness
Source: MDPI journal article supplement (doi:10.3390/biology10050408), 2021-05-05

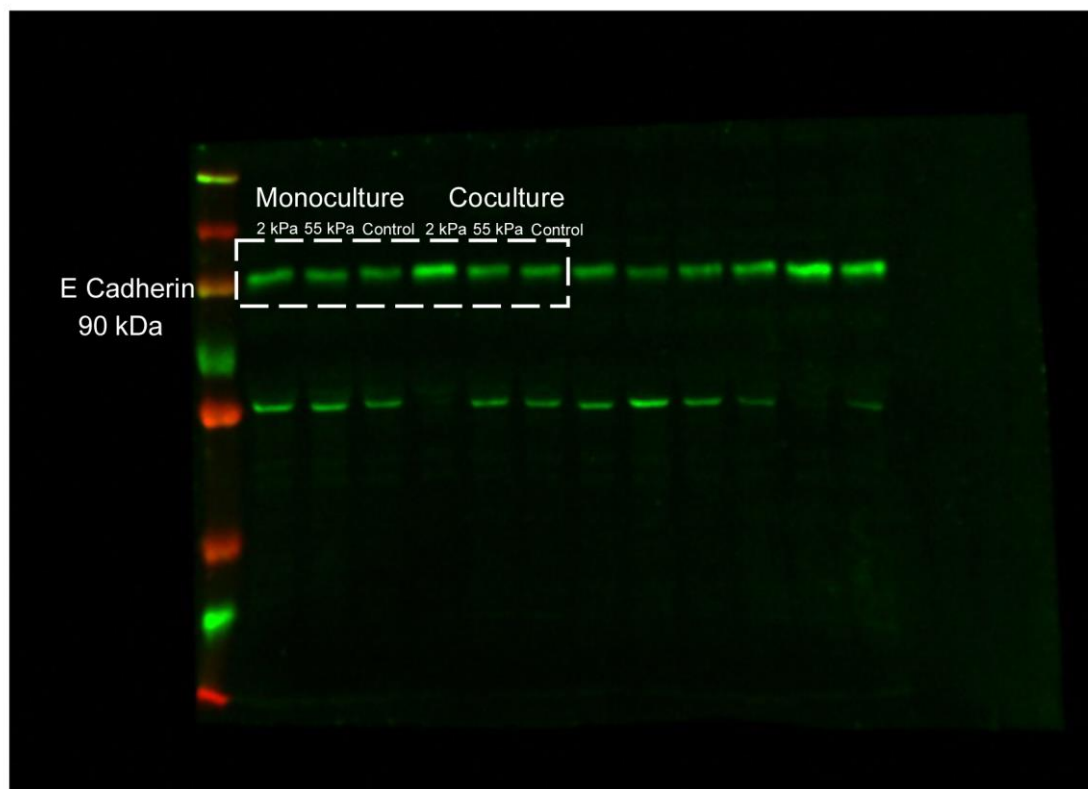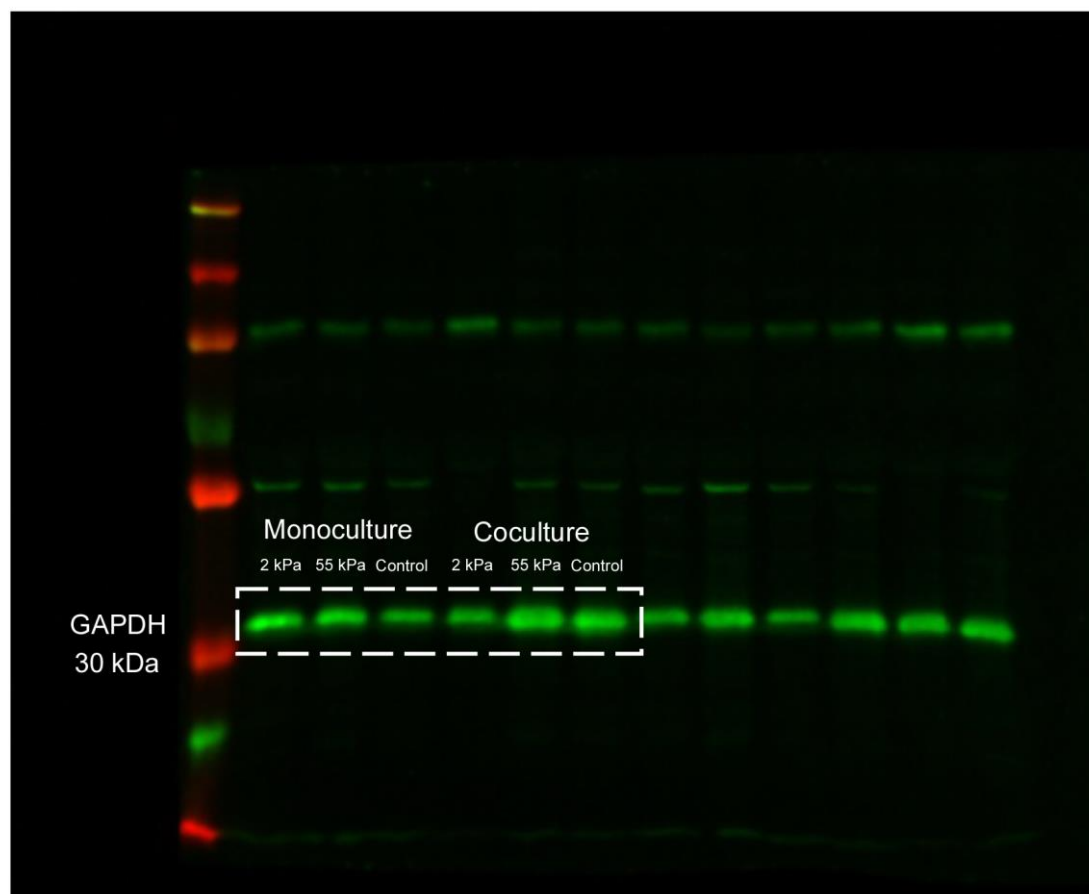

**Figure S1.** Full blots of Figure 5.

Supplement: s1 [file s1]
